# Supplementary material
Source: PubMed Central journal article supplement (PMC11439435)
Supplement: NIHMS2023185-supplement-Supplement.pdf [file NIHMS2023185-supplement-Supplement.pdf]

## SUPPORTING INFORMATION

### **Thirdhand exposures to tobacco-specific nitrosamines through inhalation, dust ingestion, dermal uptake, and epidermal chemistry.**

Xiaochen Tang<sup>1</sup>, Neal Benowitz<sup>2</sup>, Lara Gundel<sup>1</sup>, Bo Hang<sup>3</sup>, Christopher M. Havel<sup>2</sup>, Eunha Hoh<sup>4</sup>,  
Peyton Jacob III<sup>2</sup>, Jian-Hua Mao<sup>3</sup>, Manuela Martins-Green<sup>5</sup>, Georg E. Matt<sup>6</sup>, Penelope J. E.  
Quintana<sup>4</sup>, Marion L. Russell<sup>1</sup>, Altaf Sarker<sup>3</sup>, Suzaynn F. Schick<sup>2</sup>, Antoine Snijders<sup>3</sup>,  
Hugo Destailats<sup>1,\*</sup>

1. *Indoor Environment Group, Lawrence Berkeley National Laboratory, Berkeley, California 94720, USA.*
2. *Clinical Pharmacology Program, Division of Cardiology, Department of Medicine, University of California San Francisco, San Francisco, California 94143, USA.*
3. *Bioengineering & Biomedical Sciences Department, Biological Systems & Engineering Division, Lawrence Berkeley National Laboratory, Berkeley, California 94720, USA.*
4. *School of Public Health, San Diego State University, San Diego, California 92182, USA.*
5. *Department of Molecular, Cell and Systems Biology, University of California Riverside, Riverside, California 92506, USA*
6. *Department of Psychology, San Diego State University, San Diego, California 92182, USA.*

\* Corresponding author's e-mail: [HDestailats@lbl.gov](mailto:HDestailats@lbl.gov)

## Table of Contents

|                                                                                                                                                                        | Page |
|------------------------------------------------------------------------------------------------------------------------------------------------------------------------|------|
| <b>Table S1:</b> Tobacco smoke constituents in IARC Group 1                                                                                                            | S3   |
| <b>Section S1:</b> TSNA mutagenicity and carcinogenicity                                                                                                               | S4   |
| <b>Figure S1:</b> Experimental setup to expose substrates to HONO                                                                                                      | S5   |
| <b>Table S2:</b> Substrates and conditions used in the evaluation of the effects of skin liquids on the nitrosation of nicotine                                        | S6   |
| <b>Figure S2:</b> Specimens used in the nitrosation experiments                                                                                                        | S6   |
| <b>Table S3:</b> Sweat surrogate mixture composition                                                                                                                   | S6   |
| <b>Section S2.</b> Quantification of nicotine and TSNA on cellulose and cotton substrates                                                                              | S7   |
| <b>Figure S3.</b> DNA double strand breaks in lung epithelial cells in the presence of NNA                                                                             | S8   |
| <b>Figure S4.</b> Metabolite loss kinetics in mice exposed dermally to nicotine and NNK                                                                                | S9   |
| <b>Section S3:</b> Human dermal uptake of nicotine and NNK from tobacco-laden clothing                                                                                 | S10  |
| <b>Table S4:</b> Biomarkers of nicotine and NNK measured in urine before and after exposure to tobacco-contaminated clothing                                           | S10  |
| <b>Table S5:</b> Measured formation rates and predicted rate constants for NNK, NNN and NNA resulting from the nitrosation of skin-bound nicotine                      | S11  |
| <b>Section S4:</b> Determination of the NNK formation rate constant                                                                                                    | S11  |
| <b>Figure S5.</b> NNA concentration on substrates modified with artificial sweat surrogate mixture at pH = 4 and pH = 7                                                | S12  |
| <b>Table S6:</b> TSNA and nicotine concentrations in indoor and outdoor air                                                                                            | S13  |
| <b>Table S7:</b> TSNA and nicotine concentrations in settled indoor dust                                                                                               | S14  |
| <b>Table S8:</b> TSNA and nicotine concentrations in indoor surfaces and skin                                                                                          | S15  |
| <b>Table S9:</b> TSNA concentrations measured simultaneously in the gas phase and particle phase at different times after smoking ended, and fraction in the gas phase | S16  |
| <b>Figure S6.</b> NNK/nicotine ratio from different studies reported in the literature                                                                                 | S17  |
| <b>References</b>                                                                                                                                                      | S18  |

**Table S1:** Tobacco smoke constituents in IARC Group 1 (carcinogenic to humans)

|                                                      | Vapor pressure (mm Hg) |
|------------------------------------------------------|------------------------|
| <b>Organic compounds</b>                             |                        |
| Formaldehyde                                         | gas                    |
| Vinyl chloride                                       | gas                    |
| Ethylene oxide                                       | gas                    |
| 1,3-Butadiene                                        | gas                    |
| Benzene                                              | 96                     |
| 4-Aminobiphenyl                                      | $7.7 \times 10^{-2}$   |
| 2-Naphthylamine                                      | $2.6 \times 10^{-4}$   |
| N'-Nitrosonornicotine (NNN)                          | $5.1 \times 10^{-4}$   |
| 4-(Methylnitrosamino)-1-(3-pyridyl)-1-butanone (NNK) | $6.8 \times 10^{-5}$   |
| Benzo[a]pyrene (BaP)                                 | $5.5 \times 10^{-9}$   |
| <b>Inorganic species</b>                             |                        |
| Arsenic                                              | N/A                    |
| Beryllium                                            | N/A                    |
| Nickel                                               | N/A                    |
| Chromium                                             | N/A                    |
| Cadmium                                              | N/A                    |
| Polonium-210                                         | N/A                    |

**Section S1: TSNA mutagenicity and carcinogenicity**

Both NNK and NNN are activated metabolically, with formation of DNA adducts being considered critical for their mutagenicity and carcinogenicity [1, 2]. The carcinogenicity of NNK was tested in mice, rats, hamsters and mink, with administration via drinking water, gavage, subcutaneous or intraperitoneal injection, and skin painting [3-6]. NNK causes lung, liver, pancreas and other types of cancers and is more carcinogenic than NNN for the induction of lung and liver tumors in F344 rats or A/J mice [5, 7]. DNA adduct formation by NNK and NNN, after activation by the cytochrome P450 system, is considered a central mechanism for tumorigenesis [8]. In addition, the binding of NNK and NNN to the nicotinic acetylcholine receptor promotes tumor growth by enhancing and deregulating cell proliferation, migration, and invasion [9], thereby creating a microenvironment for tumor growth. The tumorigenic activity of NNA, together with NNK and NNN, was studied in strain A/J mice, and found to cause tumors, though at a lower incidence than NNK and NNN, with 36% for NNA compared to 87% and 76% for NNK and NNN, respectively [10]. In a study using a HPRT locus mutagenicity assay, NNA exhibited a mutagenic activity comparable to that of NNK in a human B-lymphoblastoid cell line expressing P450 CYP2D6 cDNA [11]. Similarly, the DNA damage caused by NNA and NNK in a comet assay quantifying strand breaks in human HepG2 cells showed a similar damage and dose response, suggesting comparable genotoxicity for both compounds [12]. Several NNA adducts were identified *in vitro* from its reaction with deoxyguanosine [13].

**Figure S1:** Experimental setup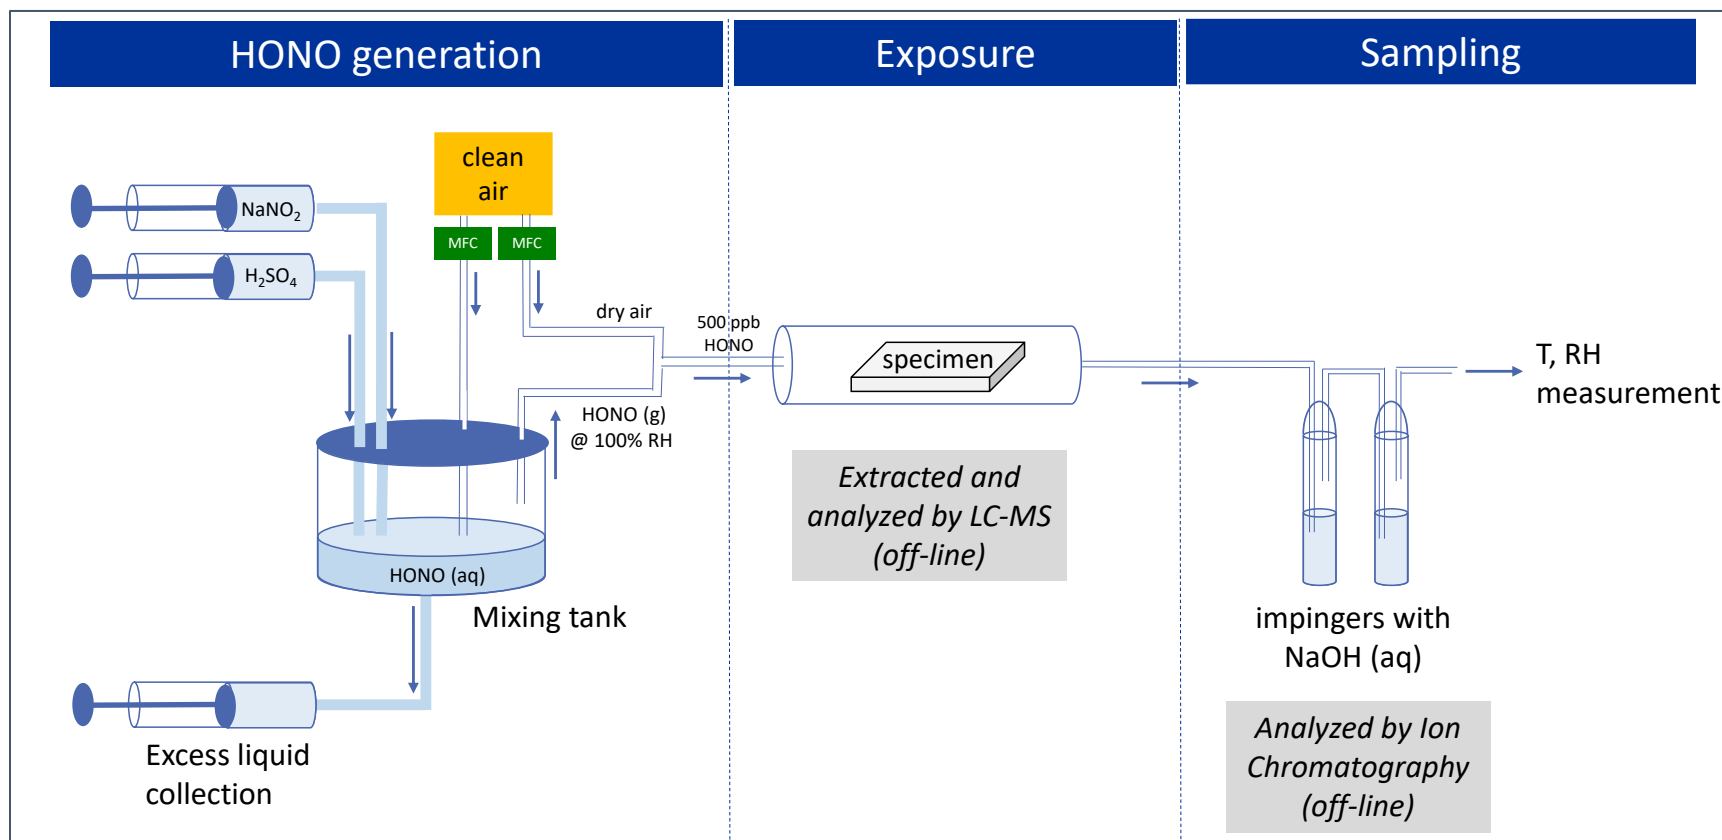

**Table S2:** Substrates and conditions used in the evaluation of the effects of skin liquids on the nitrosation of nicotine

|           | Control<br>(only HONO<br>or nicotine) | Nicotine on<br>clean<br>substrate | Nicotine &<br>skin liquids | Nicotine &<br>artificial<br>sweat, pH = 4 | Nicotine &<br>artificial<br>sweat, pH = 7 |
|-----------|---------------------------------------|-----------------------------------|----------------------------|-------------------------------------------|-------------------------------------------|
| Cellulose | ×                                     | ×                                 | ×                          | ×                                         | ×                                         |
| Cotton    | ×                                     | ×                                 | ×                          | ×                                         | ×                                         |

**Figure S2:** Specimens used in the experiments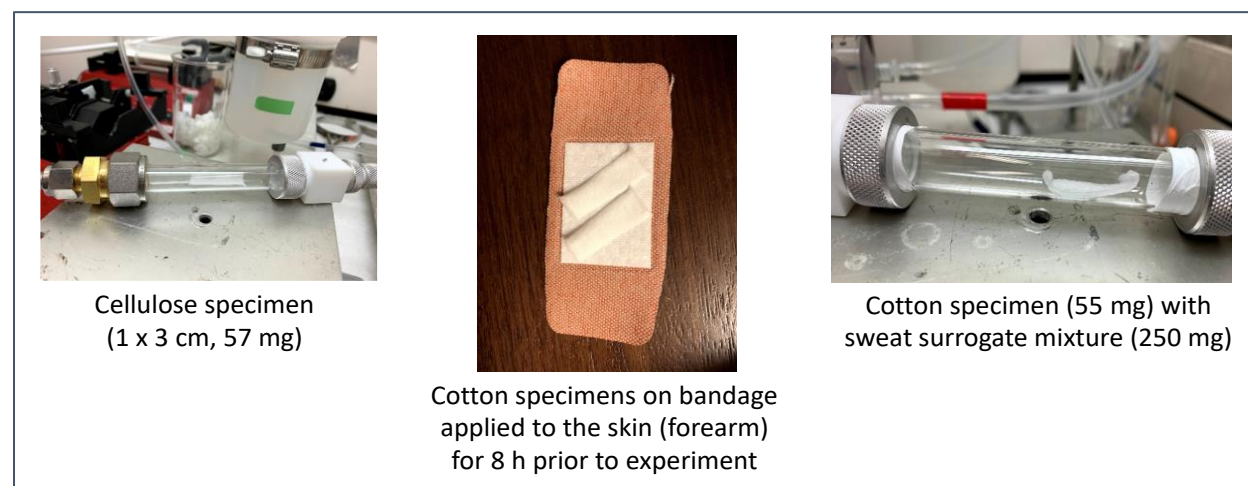**Table S3:** Sweat surrogate mixture composition\*

| Chemical           | Concentration (mM) |
|--------------------|--------------------|
| NaCl               | 340                |
| NH <sub>4</sub> Cl | 330                |
| Urea               | 83                 |
| Lactic Acid        | 170                |
| Acetic Acid        | 42                 |

\* adapted from Pavilonis et al, 2014 – *Risk Analysis* [14]

**Section S2. Quantification of nicotine and TSNA on cellulose and cotton substrates**

The determination of nicotine and TSNA is based on the method described by Whitehead et al. [28]

**NNN and NNK:** 200  $\mu\text{L}$  of standards, QCs, or sample extracts and 100  $\mu\text{L}$  internal standard solution were pipetted into a 13  $\times$  100 mm glass culture tube. These were mixed with 0.75 mL of 1:1 saturated  $\text{NaHCO}_3$ /50%  $\text{K}_2\text{CO}_3$  and 4 mL of 40:40:15:5 pentane/dichloromethane/ethyl acetate/isopropanol, added for the extraction of analytes. The tubes were vortexed, centrifuged, and placed in dry ice acetone bath to freeze the aqueous layers. The organic layers were poured into new tubes containing 200  $\mu\text{L}$  0.2N HCl in MeOH, and evaporated to dryness in a Thermo Speedvac centrifugal evaporator at (1.5h/45°C). The residues were reconstituted in 250  $\mu\text{L}$  LC mobile phase and 10  $\mu\text{L}$  were injected into the LC-MS/MS system. The LOQs were 0.05 ng/mL.

**Nicotine:** the same samples were diluted and analyzed by GC/MS to determine nicotine concentrations. The LOQ was 100 ng/mL.

**NNA:** A different aliquot from each sample was used. To 1 mL standards, QCs, and samples were added NNA- $d_3$  internal standard, followed by 750  $\mu\text{L}$  1:1 saturated  $\text{NaHCO}_3$ /50%  $\text{K}_2\text{CO}_3$  and 4 mL 45:45:10 dichloromethane/pentane/ethyl acetate. The samples were vortexed, centrifuged, and placed in a dry ice/acetone bath to freeze the aqueous layers. The organic layers were poured to culture tubes containing 100  $\mu\text{L}$  0.1N HCl in methanol. The solvent was evaporated to dryness using a centrifugal vacuum evaporator (~1.5 hr at 45 deg C). To the tubes were added 200  $\mu\text{L}$  of derivatizing agent, pentafluorophenylhydrazine (PFPH), 3 mg/mL in acetonitrile. The tubes were heated for 30 min at 60°. After cooling to room temperature, 0.5 mL of the base (1:1 saturated  $\text{NaHCO}_3$ /50%  $\text{K}_2\text{CO}_3$ ) and 4 mL of extraction solvent (45:45:10 dichloromethane/pentane/ethyl acetate) was added. The samples were vortexed, centrifuged, and placed in a dry ice/acetone bath to freeze the aqueous layers. The organic layers were poured to culture tubes containing 0.5 mL of 1 M sulfuric acid, and the samples were vortexed, centrifuged, and placed in a dry ice/acetone bath to freeze the aqueous layers. The organic layers were poured off and discarded. The above base, 0.5 mL, and 4 mL of the above extraction solvent were added. The samples were vortexed, centrifuged, and placed in a dry ice/acetone bath to freeze the aqueous layers. The organic layers were poured to culture tubes and the solvent was evaporated at 55° with a stream of nitrogen. The evaporated samples were reconstituted in 50  $\mu\text{L}$  mobile phase, 10 mM ammonium formate in 85:15 water/methanol. 20  $\mu\text{L}$  were injected into the LC-MS/MS system, with a Phenomenex Phenyl-Hexyl 3  $\times$  150 mm column, mass spectrometer with a heated ESI source (HESI), run in SRM mode, as described in Whitehead et al. The LOQ was 0.05 ng/mL.

**Figure S3.** DNA double strand breaks (DSBs) in lung epithelial cells in the presence of NNA.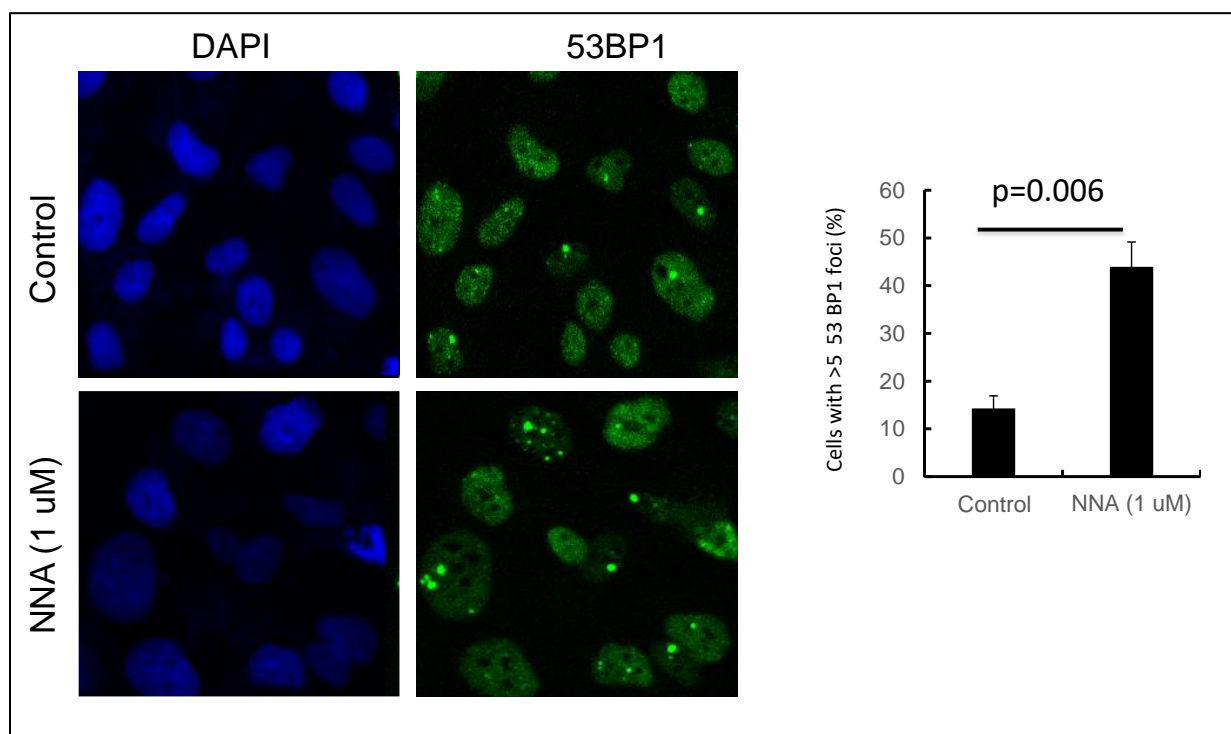



**Figure S4.** Loss kinetics for 3-HC (zero-order) and NNAL (first-order) in mice exposed dermally to nicotine and NNK, respectively.

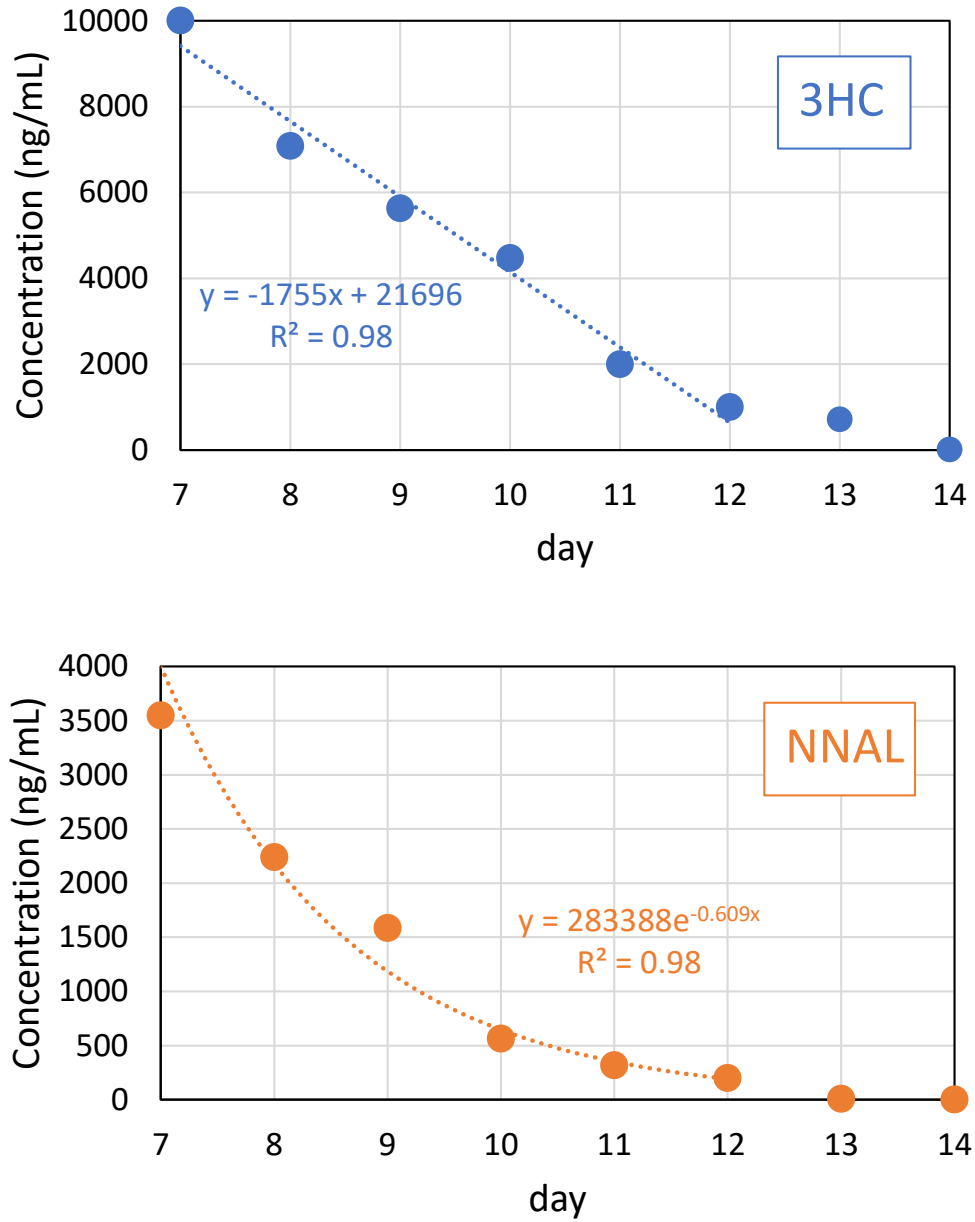

**Section S3: Human dermal uptake of nicotine and NNK from tobacco-laden clothing**

Three volunteers wore tobacco-contaminated clothing inside an environmental chamber with nearly 0.85 air changes per minute. This is approximately 100 times more air exchange than is normally seen in homes in the US [15, 16]. Thus, dermal absorption, rather than inhalation, was the dominant form of exposure in this study. The clothing was long-sleeved shirts and full-length pants that had been exposed to cigarette smoke for 30 days, at concentrations similar to those found in the home of a pack-a-day smoker (3 mgs total particulate material). Each participant also completed a control exposure where they wore similar clothing that had not been exposed to smoke and the order of the exposures was randomized. The participants did not smoke tobacco or cannabis and were not exposed to smoke at home or work. They wore the clothing for three hours and exercised enough to perspire for thirty minutes out of each of hour. Urine specimens were collected prior to exposure, and at 8 hours after the start of exposure. Metabolites of nicotine (cotinine) and NNK (NNAL) were analyzed by published methods [17, 18].

The results show that both nicotine and NNK were absorbed through the human skin. Eight hours after the start of exposure, the urinary NNAL concentration was 86-fold higher than background levels, when the participants wore THS clothing, but remained at background levels when they wore clean clothing. The corresponding cotinine concentrations increased by a factor of 18 during the same period when tobacco-contaminated clothing was worn. These findings suggest that despite having a higher molecular weight than nicotine, NNK passes through the human dermis and into the bloodstream.

**Table S4:** Biomarkers of nicotine and NNK measured in urine before (background) and eight hours after exposure to tobacco-contaminated clothing.

|                               | <b>Cotinine<br/>(ng/mg creatinine)</b> | <b>NNAL<br/>(pg/mg creatinine)</b> |
|-------------------------------|----------------------------------------|------------------------------------|
| Limit of quantification (LOQ) | 0.04                                   | 0.02                               |
| Background                    | 0.61                                   | 0.16                               |
| After exposure                | 11.1                                   | 13.8                               |

**Table S5:** Measured formation rates and predicted rate constants for NNK, NNN and NNA resulting from the nitrosation of skin-bound nicotine

| TSNA ( <i>i</i> ) | Formation rate, $r_i$                  | Rate constant, $k_i$                      |                                           |
|-------------------|----------------------------------------|-------------------------------------------|-------------------------------------------|
|                   | ( $\text{nmol m}^{-2} \text{h}^{-1}$ ) | ( $\text{ppb}^{-1} \text{h}^{-1}$ )       | ( $\text{ppb}^{-1} \text{day}^{-1}$ )     |
| NNK               | 24 – 72                                | $2.3 \times 10^{-8} - 6.9 \times 10^{-8}$ | $5.5 \times 10^{-7} - 1.6 \times 10^{-6}$ |
| NNN               | 17 – 73                                | $1.6 \times 10^{-8} - 7.0 \times 10^{-8}$ | $3.9 \times 10^{-7} - 1.7 \times 10^{-6}$ |
| NNA               | 53 - 179                               | $5.0 \times 10^{-8} - 1.7 \times 10^{-7}$ | $1.2 \times 10^{-6} - 4.1 \times 10^{-6}$ |

**Section S4: Determination of the NNK formation rate constant**

The quantitative determination of nicotine, HONO and TSNA concentrations allowed for the estimation of the rate constant  $k_{NNK}$  for NNK formation through epidermal chemistry. The formation rate  $r_{NNK}$  on experiments carried out on cellulose and cotton was between 24 and 72  $\text{nmol m}^{-2} \text{h}^{-1}$ . For these experiments, considering a nicotine skin surface concentration  $C_N = 1.5 \times 10^3 \mu\text{mol m}^{-2}$ , a HONO concentration  $[\text{HONO}] = 700 \text{ ppb}$ , and a median NNK formation rate  $r_{NNK} = 37 \text{ nmol m}^{-2} \text{h}^{-1}$ , a bimolecular reaction rate constant  $k_{NNK} = 5.5 \times 10^{-7} - 1.6 \times 10^{-6}$  was determined as the ratio:

$$k_{NNK} = \frac{r_{NNK}}{[\text{HONO}] \times C_N} \quad (\text{S1})$$

**Figure S5.** NNA concentration on substrates modified with artificial sweat surrogate mixture at pH = 4 (light blue) and pH = 7 (dark blue)

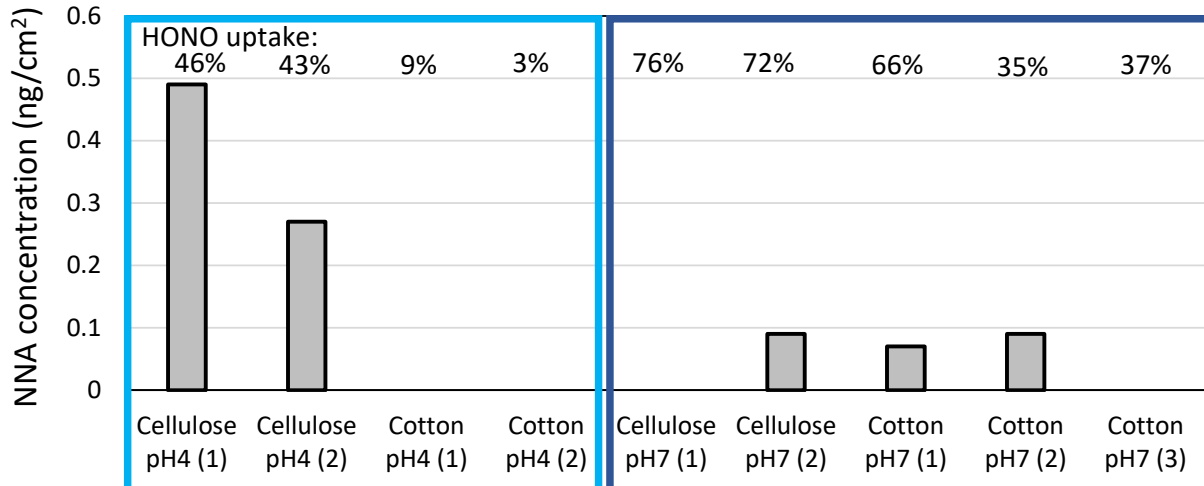

**Table S6:** TSNA and nicotine concentrations in indoor and outdoor air

| AIR                                                                  | Nicotine<br>(ng m <sup>-3</sup> ) | PM <sub>2.5</sub><br>(µg m <sup>-3</sup> ) | TSNAs                        |                              |                              | NNK /<br>nicotine<br>ratio<br>(x1000) | Reference |
|----------------------------------------------------------------------|-----------------------------------|--------------------------------------------|------------------------------|------------------------------|------------------------------|---------------------------------------|-----------|
|                                                                      |                                   |                                            | NNN<br>(pg m <sup>-3</sup> ) | NNK<br>(pg m <sup>-3</sup> ) | NNA<br>(pg m <sup>-3</sup> ) |                                       |           |
| <b>Indoor air</b>                                                    |                                   |                                            |                              |                              |                              |                                       |           |
| 16-m <sup>3</sup> room-sized chamber, secondhand smoke (SHS)         | 61,000                            | 1,500                                      | 12,000                       | 253,000                      | 1000                         | 4.1                                   | [19]      |
| 16-m <sup>3</sup> room-sized chamber, 1-3 h post-smoking (SHS/THS)   | 21,000                            | 500                                        | 5,500                        | 10,900                       |                              | 0.5                                   |           |
| 16-m <sup>3</sup> room-sized chamber, 4-18 h post-smoking (THS)      | 5,900                             | 25                                         | 120                          | 240                          | 110                          | 0.041                                 |           |
| 16-m <sup>3</sup> room-sized chamber, 19-43 h post-smoking (THS>24h) | 2,700                             | 2                                          | 80                           | 40                           | 7                            | 0.015                                 |           |
| Smoke aging chamber                                                  | 5,000 –<br>70,000                 |                                            |                              | 3,000-<br>100,000            |                              | 0.60                                  | [20]      |
| Office of 72.3 m <sup>3</sup>                                        |                                   |                                            | 810                          | 4,130                        |                              |                                       | [21]      |
| Non-smoking homes with reported past smoking                         | 70 – 400                          |                                            |                              |                              |                              |                                       | [22]      |
| Hookah bars Istanbul, Moscow, Cairo                                  | 700 –<br>1,400                    | 82-213                                     |                              | 500 –<br>1,900               |                              | 0.71                                  | [23]      |
| Bars and restaurants, Germany (n=10)                                 | 2,200-<br>33,500                  |                                            |                              | 7,000-<br>50,000             |                              | 3.2                                   | [24]      |
| Smoker homes, Germany (n=5)                                          | 3,600-<br>28,500                  |                                            |                              | 4,100-<br>23,000             |                              | 1.1                                   |           |
| Smoker offices, Germany (n=4)                                        | 4,000-<br>20,000                  |                                            |                              | 2,400-<br>15,200             |                              | 0.60                                  |           |
| Bars and restaurants, USA (n=5)                                      |                                   |                                            | n.d.-<br>22,800              | 1,400-<br>23,800             |                              |                                       | [25]      |
| <b>Outdoor (urban) air</b>                                           |                                   |                                            |                              |                              |                              |                                       |           |
| London, UK                                                           |                                   |                                            | 200                          | 290                          |                              |                                       | [26]      |
| San Francisco, CA                                                    | 3.4                               |                                            | 0.17                         | 0.63                         |                              | 0.19                                  | [13]      |
| California (five sites)                                              | 0.41 - 7.6                        |                                            |                              | 0.2 – 4.3                    |                              |                                       | [27]      |
| Birmingham, UK                                                       | 0.54 - 5.5                        |                                            |                              | 4.3                          |                              |                                       |           |
| Hong Kong, China                                                     |                                   |                                            |                              | 4.2 – 9.9                    |                              |                                       |           |
| Msida, Malta                                                         | 6.7 - 82                          | 8                                          |                              | 2.1 – 37                     |                              |                                       |           |

**Table S7:** TSNA and nicotine concentrations in settled indoor dust

| DUST                                     | Nicotine<br>( $\mu\text{g g}^{-1}$ ) | n              | TSNAs                         |                               |                               |      |      | NNK /<br>nicotine<br>ratio<br>(x1000) | Reference |
|------------------------------------------|--------------------------------------|----------------|-------------------------------|-------------------------------|-------------------------------|------|------|---------------------------------------|-----------|
|                                          |                                      |                | NNN<br>( $\text{ng g}^{-1}$ ) | NNK<br>( $\text{ng g}^{-1}$ ) | NNA<br>( $\text{ng g}^{-1}$ ) | NAT  | NAB  |                                       |           |
| CA - smokers' homes (2002-2007)          | 7                                    | 6              | 1.6                           | 3.7                           | 0.46                          |      |      | 0.53                                  | [28]      |
| CA - non-smokers homes (2002-2007)       | 0.52                                 | 20             | <LOQ                          | <LOQ                          | <LOQ                          |      |      |                                       |           |
| CA - smokers' homes (2010)               | 7.8                                  | 6              | 2.9                           | 5.8                           | 0.6                           |      |      | 0.74                                  |           |
| CA - non-smokers homes (2010)            | 0.51                                 | 20             | <LOQ                          | 0.51                          | <LOQ                          |      |      | 1.00                                  |           |
| CA - homes - baseline                    | 17.4                                 | 17/22/65       | 2.5                           | 8.9                           |                               | 2.0  | 0.9  | 0.51                                  | [29]      |
| CA - homes - week 1 after quitting       | 10.5                                 | 7 and<br>13/22 | 1.5                           | 11.2                          |                               | 3.4  | <LOQ | 1.07                                  |           |
| CA - homes - month 1 after quitting      | 5.2                                  | 4 and 9        |                               | 9.9                           |                               | <LOQ |      | 1.90                                  |           |
| CA - homes - month 3 after quitting      | 2.8                                  | 7              |                               |                               |                               |      |      |                                       |           |
| CA - homes - month 6 after quitting      | 3.8                                  | 5              |                               |                               |                               |      |      |                                       |           |
| CA - casino bingo hall (smoking)         | 121                                  |                | 24                            | 84                            |                               | 31   | 8.6  | 0.69                                  | [30]      |
| CA - casino slots (non-smoking)          | 145                                  |                | 23                            | 53                            |                               | 13   | 6.4  | 0.37                                  |           |
| CA - casino central area (pit)           | 170                                  |                | 14                            | 31                            |                               | 34   | 2.6  | 0.18                                  |           |
| Korea - government buildings             |                                      | 10             |                               | 189                           |                               |      |      |                                       | [31]      |
| Korea - large buildings                  |                                      | 10             |                               | 198                           |                               |      |      |                                       |           |
| Korea - nurseries                        |                                      | 5              |                               | 15                            |                               |      |      |                                       |           |
| Korea - private educational institutions |                                      | 7              |                               | 45                            |                               |      |      |                                       |           |
| China – smoking hotel rooms              |                                      | 31             | 640 (230<br>– 1200)           | 1190<br>(320 –<br>3720)       | 40<br>(<LOQ –<br>130)         |      |      |                                       | [32]      |
| Europe - nonsmokers house dust           | 2.3                                  |                |                               | 40                            |                               |      |      | 17.4                                  | [33]      |
| Europe - smokers house dust              | 26                                   |                |                               | 540                           |                               |      |      | 20.8                                  |           |

**Table S8:** TSNA and nicotine concentrations in indoor surfaces and skin

| SURFACES AND SKIN                                           | n   | Nicotine<br>( $\mu\text{g m}^{-2}$ ) | TSNAs                         |                               |                               | Reference |
|-------------------------------------------------------------|-----|--------------------------------------|-------------------------------|-------------------------------|-------------------------------|-----------|
|                                                             |     |                                      | NNN<br>( $\text{ng m}^{-2}$ ) | NNK<br>( $\text{ng m}^{-2}$ ) | NNA<br>( $\text{ng m}^{-2}$ ) |           |
| Homes - baseline                                            | 45  | 31.2                                 |                               |                               |                               | [29]      |
| Homes - week 1 after quitting                               | 35  | 10.8                                 |                               |                               |                               |           |
| Homes - month 1 after quitting                              | 17  | 4.3                                  |                               |                               |                               |           |
| Homes - month 3 after quitting                              | 11  | 2.6                                  |                               |                               |                               |           |
| Homes - month 6 after quitting                              | 7   | 3.2                                  |                               |                               |                               |           |
| Apartments – multiunit housing                              | 38  | 7.2 - 62                             |                               |                               |                               | [34]      |
| 37 smoker homes                                             | 37  |                                      |                               | 70                            |                               | [35]      |
| 19 nonsmoker homes                                          | 19  |                                      |                               | <LOQ                          |                               |           |
| Nonsmoker homes (living room)                               | 5   | 1.37                                 |                               |                               |                               | [36]      |
| Hookah-only smoker homes                                    | 19  | 32                                   |                               |                               |                               |           |
| NICU crib/incubator                                         | 5   | 0.18                                 |                               |                               |                               | [37]      |
| NICU furniture                                              | 6   | 7.9                                  |                               |                               |                               |           |
| Terrycloth stored 11 months                                 |     | 106                                  | 37                            | 170                           | 229                           | [38]      |
| Terrycloth stored 16 months                                 |     | 113                                  | 46                            | 219                           | 219                           |           |
| Terrycloth stored 19 months                                 |     | 70                                   | 31                            | 132                           | 88                            |           |
| Polyester stored 11 months                                  |     | 0.56                                 |                               |                               |                               |           |
| Polyester stored 19 months                                  |     | 1.79                                 |                               | 3.2                           |                               |           |
| Smoker's finger                                             | 17  | 150 (a)                              |                               |                               |                               | [39]      |
| Finger of occupants in smoking homes                        | 91  | 157 (a)                              |                               |                               |                               | [22]      |
| Finger of non-smoker new occupants                          | 19  | 1.2 (a)                              |                               |                               |                               |           |
| Children's hands                                            | 276 | 9 (b)                                |                               |                               |                               | [40]      |
| Children's hands (protected from exposure to tobacco smoke) | 311 | 0.3 (b)                              |                               |                               |                               | [41]      |
| Children's hands (exposed to smoke)                         | 193 | 2.2 (b)                              |                               |                               |                               |           |
| Children's hands (THS-free home)                            | 10  | 1.3                                  |                               |                               |                               | [42]      |
| Children's hands (THS-polluted home)                        | 19  | 32                                   |                               |                               |                               |           |
| Silicone wristbands used as exposure monitors for 2 days    | 31  | 167                                  |                               |                               |                               | [43]      |

(a) assumes 42 cm<sup>2</sup> per wipe(b) assumes 100 cm<sup>2</sup> per wipe

**Table S9:** TSNA concentrations measured simultaneously in the gas phase and particle phase at different times after smoking ended, and fraction of each compound in the gas phase (results published in Tang et al, 2021 [19], Figure 2)

| Compound                                          | Blank chamber | SHS (fresh smoke) | SHS/THS (1-3 h post smoking) | THS (4-18 h post smoking) | THS>24h (19-43 h post smoking) |
|---------------------------------------------------|---------------|-------------------|------------------------------|---------------------------|--------------------------------|
| <b>Denuder (gas phase), ng m<sup>-3</sup></b>     |               |                   |                              |                           |                                |
| NNN                                               | 0.01          | 0.9               | 0.5                          | 0.02                      | 0.06                           |
| NNA                                               | n.d.          | n.d.              | n.d.                         | 0.07                      | 0.01                           |
| NNK                                               | n.d.          | 2.4               | 0.41                         | 0.19                      | 0.04                           |
| <b>Filter (particle phase), ng m<sup>-3</sup></b> |               |                   |                              |                           |                                |
| NNN                                               | 0.06          | 15.2              | 4.89                         | 0.098                     | n.d.                           |
| NNA                                               | 0.036         | 1.28              | n.d.                         | n.d.                      | n.d.                           |
| NNK                                               | 0.031         | 245               | 12.8                         | 0.039                     | n.d.                           |
| <b>Fraction in gas phase, <math>f_g</math></b>    |               |                   |                              |                           |                                |
| NNN                                               |               | 6%                | 9%                           | 21%                       | 100%                           |
| NNA                                               |               | 0%                | 0%                           | 100%                      | 100%                           |
| NNK                                               |               | 1%                | 3%                           | 96%                       | 100%                           |



**Figure S6.** NNK/nicotine ratio from different studies reported in the literature in A) indoor air, B) indoor settled dust, and C) indoor surfaces. Labels “SHS” and “THS” indicate samples that are more typically associated with secondhand and thirdhand smoke, respectively.

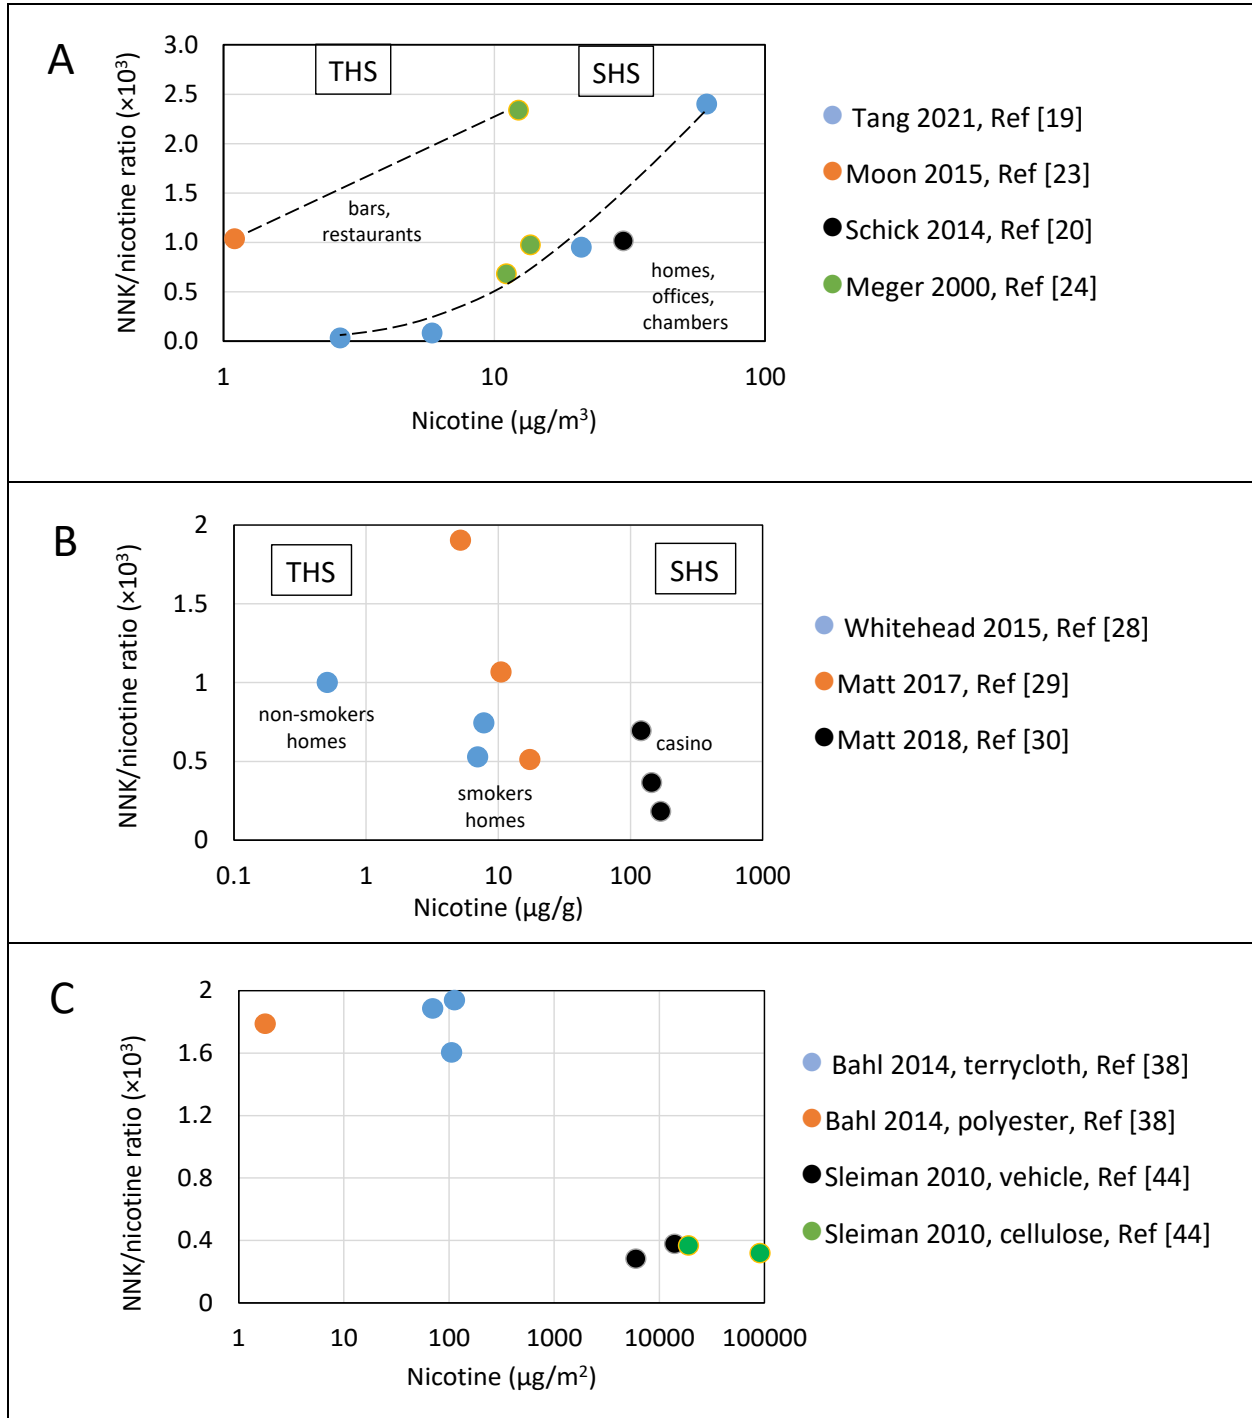

**REFERENCES**

- [1]. S.S. Hecht, Biochemistry, biology, and carcinogenicity of tobacco specific N- nitrosamines. . Chem. Res. Toxicol. 11 (1998) 559-603.
- [2]. S.S. Hecht, Tobacco carcinogens, their biomarkers and tobacco-induced cancer. Nat. Rev. Cancer 3 (2003) 733-744.
- [3]. S.S. Hecht, C.B. Chen, T. Ohmori, and D. Hoffmann, A study of tobacco carcinogenesis. XIX. Comparative carcinogenicity in F344 rats of the tobacco- specific nitrosamines. N' nitrosornicotine and 4- (methylnitrosamino)-l-(3-pyridyl)-l-butanone. . Cancer Research 40 (1980) 298-302.
- [4]. S.S. Hecht and D. Hoffmann, The relevance of tobacco-specific nitrosamines to human cancer. Cancer Surv. 8 (1989) 271-294.
- [5]. S.S. Hecht, K.G. Jordan, C.-I. Choi, and N. Trushin, Effects of deuterium substitution on the tumorigenicity of 4-(methylnitrosamino)-l-(3-pyridyl)-l-butanone and 4-(methylnitrosamino)-l-(3-pyridyl)-l-butanol in A/J mice. . Carcinogenesis 11 (1990) 1017-1020.
- [6]. A. Rivenson, M.V. Djordjevic, S. Amin, and D. Hoffmann, A study of tobacco carcinogenesis. XLIV. Bio- assay in A/J mice of some nitrosamines. . Cancer Lett. 47 (1989) 111-114.
- [7]. D. Hoffmann, M.V. Djordjevic, A. Rivenson, E. Zang, D. Desai, and S. Amin, A study of tobacco carcinogenesis. LI. Relative potencies of tobacco-specific N-nitrosamines as inducers of lung tumours in A/J mice. . Cancer Lett. 71 (1993) 25-30.
- [8]. B. Hang, Formation and repair of tobacco carcinogen-derived bulky DNA adducts. . J. Nucleic Acids Dec 20 (2010) 709521.
- [9]. G. Akopyan and B. Bonavida, Understanding tobacco smoke carcinogen NNK and lung tumorigenesis. . Int. J. Oncology 29(4) (2006) 745-752.
- [10]. S.S. Hecht, C.B. Chen, N. Hirota, R.M. Ornaf, T.C. Tso, and D. Hoffmann, Tobacco-specific nitrosamines: formation from nicotine in vitro and during tobacco curing and carcinogenicity in strain A mice. J. Natl. Cancer Inst. 60(4) (1978) 819-824.

- [11]. C.L. Crespi, B.W. Penman, H.V. Gelboin, and F.J. Gonzalez, A tobacco smoke-derived nitrosamine, 4(methylnitrosamino)-1-(3-pyridyl)-1-butanone, is activated by multiple human cytochrome P450s including the polymorphic human cytochrome P4502D6. *Carcinogenesis* 12(7) (1991) 1197-1201.
- [12]. B. Hang, A.H. Sarker, C. Havel, S. Saha, T.K. Hazra, S. Schick, P. Jacob, V. Rehan, A. Chenna, D. Sharan, M. Sleiman, H. Destailats, and L.A. Gundel, Thirdhand smoke causes DNA damage in human cells. *Mutagenesis* 28 (4) (2013). <https://doi.org/10.1093/mutage/get013>.
- [13]. P. Jacob, N. Benowitz, H. Destailats, L.A. Gundel, B. Hang, M. Martins-Green, G.E. Matt, P.J.E. Quintana, J. Samet, S. Schick, P. Talbot, N.J. Aquilina, M.F. Hovell, J.-H. Mao, and T.P. Whitehead, Thirdhand smoke: New evidence, challenges and future directions. *Chem. Res. Toxicol.* 30 (2017) 270-294. <https://doi.org/DOI: 10.1021/acs.chemrestox.6b00343>.
- [14]. B.T. Pavilonis, C.P. Weisel, B. Buckley, and P. Liroy, Bioaccessibility and risk of exposure to metals and SVOCs in artificial turf field fill materials and fibers. *Risk Analysis* 34(1) (2014) 44-55. <https://doi.org/10.1111/risa.12081>.
- [15]. M.D. Pandian, W.R. Ott, and J.V. Behar, Residential air exchange rates for use in indoor air and exposure modeling studies. *J. Exposure Anal. Environ. Epidemiol.* 3(4) (1993) 407-416.
- [16]. N. Yamamoto, D.G. Shendel, A.M. Winer, and J. Zhang, Residential air exchange rates in three major US metropolitan areas: results from the Relationship Among Indoor, Outdoor, and Personal Air Study 1999-2001. *Indoor Air* 20(1) (2010) 85-90. <https://doi.org/10.1111/j.1600-0668.2009.00622.x>.
- [17]. P. Jacob, C. Havel, D.H. Lee, L. Yu, M.D. Eisner, and N. Benowitz, Subpicogram per milliliter determination of the tobacco-specific carcinogen metabolite 4-(methylnitrosamino)-1-(3-pyridyl)-1-butanol in human urine using liquid chromatography-tandem mass spectrometry. *Anal. Chem.* 80 (2008) 8115-8121. <https://doi.org/10.1021/ac8009005>.
- [18]. P. Jacob, L. Yu, M. Duan, L. Ramos, O. Yturralde, and N. Benowitz, Determination of the nicotine metabolites cotinine and trans-3'-hydroxycotinine in biologic fluids of smokers and non-smokers using liquid chromatography-tandem mass spectrometry: Biomarkers for tobacco smoke. *J. Chromatogr. B. Analyt. Technol. Biomed. Life Sci.* 879(3-4) (2011) 267-276. <https://doi.org/10.1016/j.jchromb.2010.12.012>.

- [19]. X. Tang, N. Ramirez Gonzalez, M.L. Russell, R.L. Maddalena, L.A. Gundel, and H. Destailats, Chemical changes in thirdhand smoke associated with remediation using an ozone generator. *Environ. Research* 198 (2021) 110462. <https://doi.org/10.1016/j.envres.2020.110462>.
- [20]. S.F. Schick, K.F. Farraro, C. Perrino, M. Sleiman, G. van de Vossenberg, M.P. Trinh, S.K. Hammond, B.M. Jenkins, and J. Balmes, Thirdhand cigarette smoke in an experimental chamber: evidence of surface deposition of nicotine, nitrosamines and polycyclic aromatic hydrocarbons and de novo formation of NNK. *Tobacco Control* 23 (2) (2014) 152-159. <https://doi.org/10.1136/tobaccocontrol-2012-050915>.
- [21]. M. Gomez Lueso, M. Mitova, N. Mottier, M. Schaller, M. Rotach, and C. Goujon-Gingler, Development and validation of a method for quantification of two tobacco-specific nitrosamines in indoor air. *J. Chromatography A*. 1580 (2018) 90-99.
- [22]. G.E. Matt, P.J.E. Quintana, J.M. Zakarian, R. Fortmann, D.A. Chatfield, E. Hoh, A. Uribe, and M.F. Hovell, When smokers move out and non-smokers move in: residential thirdhand smoke pollution and exposure *Tobacco Control* 20 (2011) e1. <https://doi.org/10.1136/tc.2010.037382>.
- [23]. K.A. Moon, H. Magid, C. Torrey, A. Rule, J. Ferguson, J. Susan, Z. Sun, S. Abubaker, V. Levshin, A. Carkoglu, G. Radwan, M. El-Rabbat, J. Cohen, P. Strickland, A. Navas-Acien, and P.N. Breyse, Secondhand smoke in waterpipe tobacco venues in Istanbul, Moscow and Cairo. *Environ. Research* (2015) 568-574.
- [24]. M. Meger, I. Meger-Kossien, K. Riedel, and G. Scherer, Biomonitoring of environmental tobacco smoke (ETS)-related exposure to 4-(methylnitrosamino)-1-(3-pyridyl)-1-butanone (NNK). *Biomarkers* 5 (2000) 33-45.
- [25]. K.D. Brunnemann, B. Prokopczyk, M.V. Djordjevic, and D. Hoffmann, Formation and analysis of tobacco-specific N-nitrosamines. *Critical Reviews in Toxicology* 26 (1996) 121-137.
- [26]. N. Farren, N. Ramirez Gonzalez, J. Lee, E. Finessi, A. Lewis, and J. Hamilton, Estimated Exposure Risks from Carcinogenic Nitrosamines in Urban Airborne Particulate Matter. *Environ. Sci. Technol.* 49 (2015) 9648-9656.
- [27]. N.J. Aquilina, C. Havel, R.M. Harrison, K.-F. Ho, N. Benowitz, and P. Jacob, Determination of 4-(Methylnitrosamino)-1-(3-Pyridyl)-1-Butanone (NNK) arising from tobacco smoke in airborne particulate matter. *Environment International* 158 (2022) 106992. <https://doi.org/10.1016/j.envint.2021.106992>.

- [28]. T.P. Whitehead, C. Havel, C. Metayer, N. Benowitz, and P. Jacob, Tobacco alkaloids and tobacco-specific nitrosamines in dust from homes of smokeless tobacco users, active smokers, and nontobacco users. *Chem. Res. Toxicol.* 28 (2015) 1007-1014.
- [29]. G.E. Matt, P.J.E. Quintana, J.M. Zakarian, E. Hoh, M.F. Hovell, M. Mahabee-Gittens, K. Watanabe, K. Datuin, C. Vue, and D.A. Chatfield, When smokers quit: exposure to nicotine and carcinogens persists from thirdhand smoke pollution. *Tobacco Control* 26 (5) (2017) 548-556. <https://doi.org/10.1136/tobaccocontrol-2016-053119>.
- [30]. G.E. Matt, P.J.E. Quintana, E. Hoh, J.M. Zakarian, Z. Chowdhury, M.F. Hovell, P. Jacob, K. Watanabe, T.S. Theweny, V. Flores, A. Nguyen, N. Dhaliwal, and G. Hayward, A Casino goes smoke free: a longitudinal study of secondhand and thirdhand smoke pollution and exposure. *Tobacco Control* 27 (6) (2018) 643. <https://doi.org/10.1136/tobaccocontrol-2017-054052>.
- [31]. E.Y. Park, E.H. Yun, M.K. Lim, D.H. Lee, W. Yang, B.Y. Jeong, and S.-H. Hwang, Consequences of incomplete smoke-free legislation in the Republic of Korea: Results from environmental and biochemical monitoring: Community based study. *Cancer Res. Treat.* 48(1) (2016) 376-383. <https://doi.org/10.4143/crt.2014.269>.
- [32]. K. Min, P. Guo, D. Chen, S. Huang, W. Luo, M. Ma, B. Chen, S. Yao, and H. Zuilhof, Direct and quantitative in-situ analysis of third-hand smoke in and on various matrices by ambient desorption corona beam ionization mass spectrometry. *Talanta* 219 (2020) 121330. <https://doi.org/10.1016/j.talanta.2020.121330>.
- [33]. N. Ramirez Gonzalez, M. Ozel, A. Lewis, R. Marce, F. Borrul, and J. Hamilton, Exposure to nitrosamines in thirdhand tobacco smoke increases cancer risk in non-smokers. *Environment International* 71 (2014) 139-147.
- [34]. G.E. Matt, P.J.E. Quintana, E. Hoh, J.M. Zakarian, N.G. Dodder, R.A. Record, M.F. Hovell, M. Mahabee-Gittens, S. Padilla, L. Markman, K. Watanabe, and T.E. Novotny, Remediating thirdhand smoke pollution in multiunit housing: Temporary reduction and the challenges of persistent reservoirs. *Nic. Tob. Research* (2021) 364-372. <https://doi.org/10.1093/ntr/ntaa151>.
- [35]. J.L. Thomas, S.S. Hecht, X. Luo, X. Ming, J.S. Ahluwalia, and S.G. Carmella, Thirdhand tobacco smoke: A tobacco-specific lung carcinogen on surfaces in smokers' homes. *Nic. Tob. Research* 16(1) (2014) 26-32.

- [36]. N. Kassem, R.M. Daffa, S. Liles, S.R. Jackson, N. Kassem, M. Younis, S. Mehta, M. Chen, P. Jacob, S.G. Carmella, D. Chatfield, N. Benowitz, G.E. Matt, S.S. Hecht, and M.F. Hovell, Children's exposure to secondhand and thirdhand smoke carcinogens and toxicants in homes of hookah smokers. *Nic. Tob. Research* 16 (2014) 961-975.
- [37]. T.F. Northrup, A.M. Khan, P. Jacob, N. Benowitz, E. Hoh, M.F. Hovell, G.E. Matt, and A. Stotts, Thirdhand smoke contamination in hospital settings: assessing exposure risk for vulnerable paediatric patients. *Tobacco Control* 25 (2016) 619-523.
- [38]. V. Bahl, P. Jacob, 3rd, C. Havel, S.F. Schick, and P. Talbot, Thirdhand cigarette smoke: factors affecting exposure and remediation. *PloS one* 9 (10) (2014) e108258-e108258.  
<https://doi.org/10.1371/journal.pone.0108258>.
- [39]. G.E. Matt, P.J.E. Quintana, M.F. Hovell, J.T. Bernert, S. Song, N. Novianti, T. Juarez, J. Floro, C. Gehrman, M. Garcia, and S. Larson, Households contaminated by environmental tobacco smoke: Sources of infant exposures. *Tobacco Control* 13 (2004) 29-37.  
<https://doi.org/10.1136/tc.2003.003889>.
- [40]. M. Mahabee-Gittens, A.L. Merianos, R.A. Jandarov, P.J.E. Quintana, E. Hoh, and G.E. Matt, Differential associations of hand nicotine and urinary cotinine with children's exposure to tobacco smoke and clinical outcomes. *Environ. Research* 202 (2021) 111722.  
<https://doi.org/10.1016/j.envres.2021.111722>.
- [41]. G.E. Matt, A.L. Merianos, P.J.E. Quintana, E. Hoh, N.G. Dodder, and M. Mahabee-Gittens, Prevalence and income-related disparities in thirdhand smoke exposure to children. *JAMA Netw Open* 5(2) (2022) e2147184. <https://doi.org/10.1001/jamanetworkopen.2021.47184>.
- [42]. S.T. Kelley, W. Liu, P.J.E. Quintana, E. Hoh, N.G. Dodder, M. Mahabee-Gittens, S. Padilla, S. Ogden, S. Frenzel, L. Sisk-Hackworth, and G.E. Matt, Altered microbiomes in thirdhand smoke-exposed children and their home environments. *Pediatric Research* 90 (2021) 1153-1160.  
<https://doi.org/10.1038/s41390-021-01400-1>.
- [43]. P.J.E. Quintana, E. Hoh, N.G. Dodder, G.E. Matt, J.M. Zakarian, K.A. Anderson, B. Akins, L. Chu, and M.F. Hovell, Nicotine levels in silicone wristband samplers worn by children exposed to secondhand smoke and electronic cigarette vapor are highly correlated with child's urinary cotinine. *J. Exposure Anal. Environ. Epidemiol.* 29 (2019) 733-741.  
<https://doi.org/10.1038/s41370-019-0116-7>.

- [44]. M. Sleiman, L.A. Gundel, J.F. Pankow, P. Jacob, B.C. Singer, and H. Destailats, Formation of carcinogens indoors by surface-mediated reactions of nicotine with nitrous acid, leading to potential thirdhand smoke hazards. *Proceedings of the National Academy of Sciences USA* 107 (15) (2010) 6576-6581. <https://doi.org/10.1073/pnas.0912820107>
